# Supplementary material for: Pan-keratin Immunostaining in Human Tumors: A Tissue Microarray Study of 15,940 Tumors
Source: PubMed Central journal article supplement (PMC10492441; doi:10.1177/10668969221117243), 2022-08-09

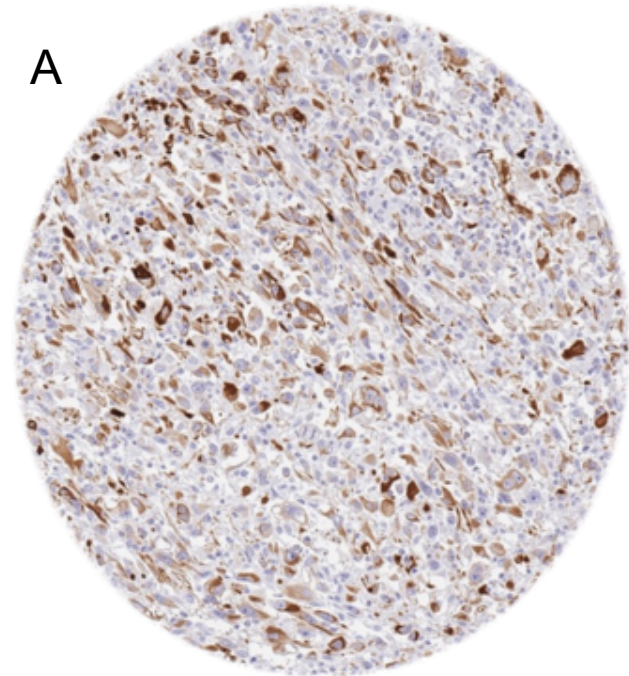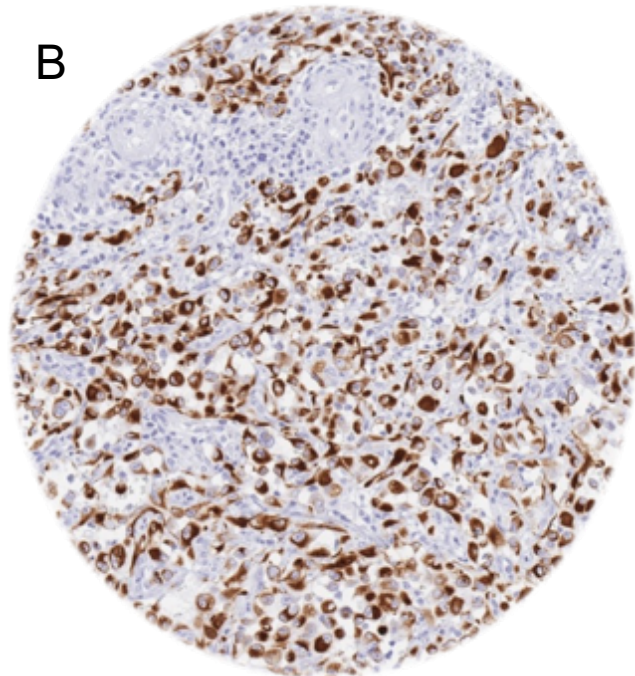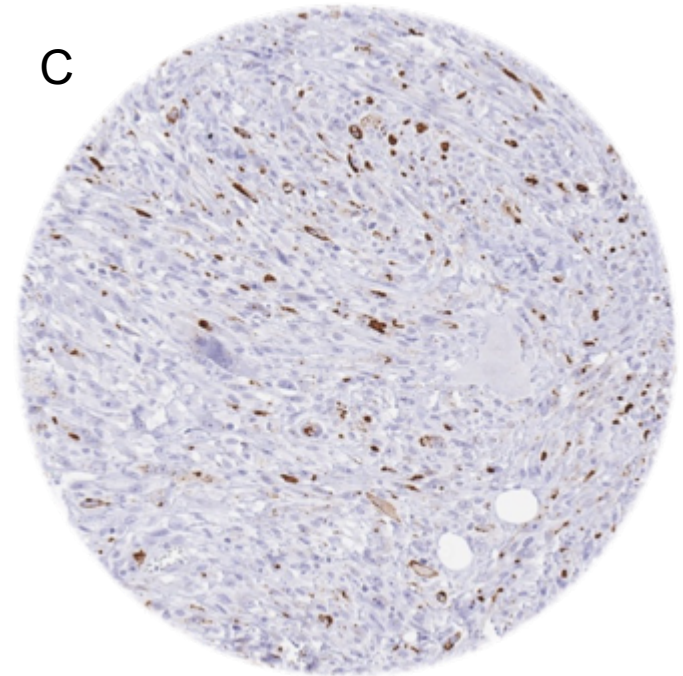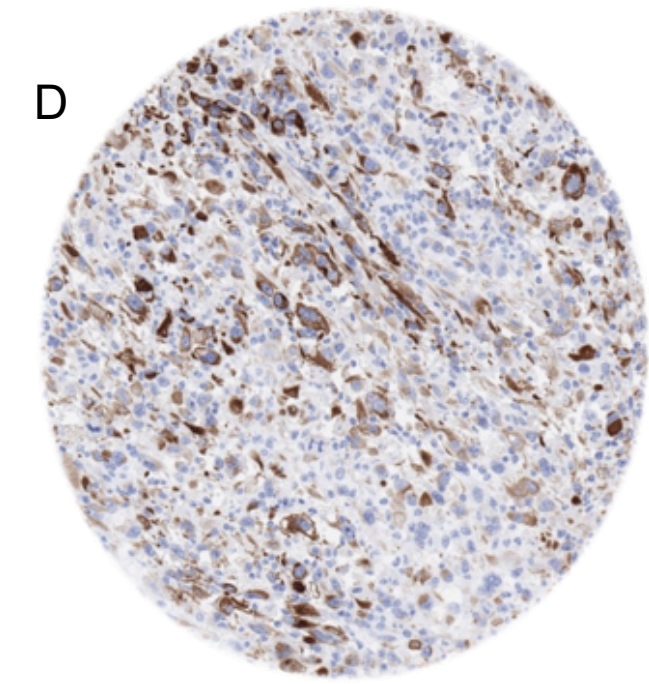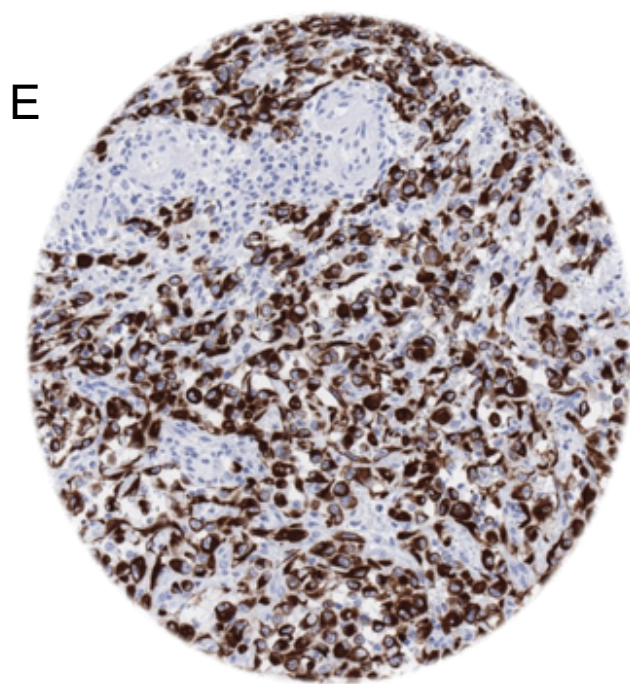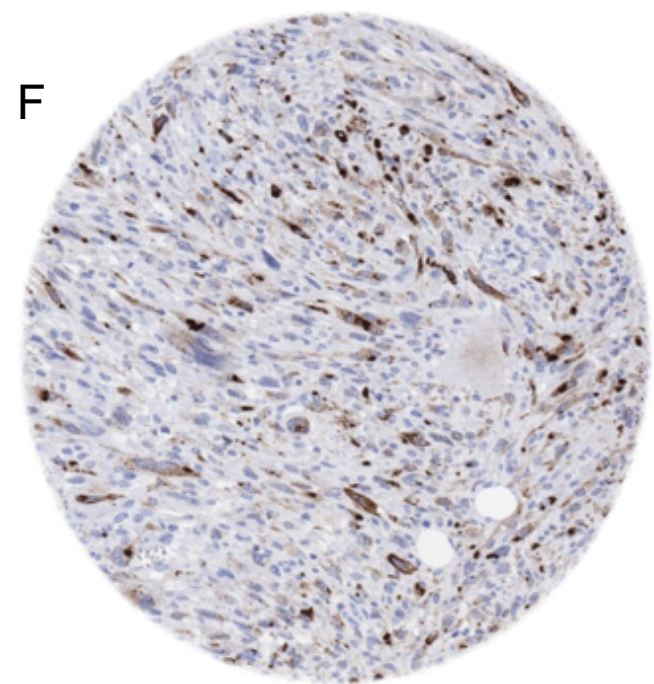

Supplement: sj-pdf-1-ijs-10.1177_10668969221117243.pdf [file sj-pdf-1-ijs-10.1177_10668969221117243.pdf]
